# Supplementary material for: High diversity in species, reproductive modes and distribution within the Paramacrobiotus richtersi complex (Eutardigrada, Macrobiotidae)
Source: Zoological Lett. 2019 Jan 3;5:1. doi: 10.1186/s40851-018-0113-z (PMC6317227; doi:10.1186/s40851-018-0113-z)
Supplement: Supplementary file 2 — Table S1. Genetic distances (p-distance) computed among and within populations. All new haplotypes and those available in GenBank have been considered in the analysis, which was carried out on a 606 bp dataset. (XLSX 19 kb) [file 40851_2018_113_MOESM2_ESM.xlsx]

## Sheet: MatrixOutput
		1	2	3	4	5	6	7	8	9	10	11	12	13	14	15	16	17	18	19	20	21	22	23	24	25	26	27	28	29	30	31	32	33	34	35	36	37	38	39	40	41	42	43	44	45	46	47	48
1	HQ876584 Macrobiotus hufelandi C2953 US1 COI
2	MF568534 Paramacrobiotus lachowskae Colombia COI	0.221122
3	KU513421 Paramacrobiotus cf. richtersi Poland COI	0.235974	0.219472
4	KF788251 Paramacrobiotus gr. richtersi sp. 1 Colombia T1 COI	0.214521	0.217822	0.212871
5	KF788252 Paramacrobiotus gr. richtersi sp. 1 Colombia T2 COI	0.214521	0.217822	0.212871	0
6	KF788253 Paramacrobiotus gr. richtersi sp. 1 Colombia T3 COI	0.214521	0.221122	0.212871	0.00330033	0.00330033
7	KF788254 Paramacrobiotus gr. richtersi sp. 1 Colombia T4 COI	0.214521	0.221122	0.212871	0.00330033	0.00330033	0
8	KF788255 Paramacrobiotus gr. richtersi sp. 1 Colombia T6 COI	0.214521	0.221122	0.212871	0.00330033	0.00330033	0	0
9	KF788256 Paramacrobiotus gr. richtersi sp. 1 Colombia T7 COI	0.214521	0.221122	0.212871	0.00330033	0.00330033	0	0	0
10	KF788257 Paramacrobiotus gr. richtersi sp. 1 Colombia T8 COI	0.214521	0.221122	0.212871	0.00330033	0.00330033	0	0	0	0
11	EU244605 Paramacrobiotus gr. richtersi Germany COI	0.20297	0.217822	0.20462	0.209571	0.209571	0.209571	0.209571	0.209571	0.209571	0.209571
12	FJ435809 Paramacrobiotus gr. richtersi Spain Tar709 COI	0.232673	0.219472	0.0049505	0.216172	0.216172	0.216172	0.216172	0.216172	0.216172	0.216172	0.20462
13	FJ435808 Paramacrobiotus gr. richtersi Spain Tar708 COI	0.235974	0.219472	0.00165017	0.212871	0.212871	0.212871	0.212871	0.212871	0.212871	0.212871	0.20462	0.0049505
14	EU244597 Paramacrobiotus fairbanksi 1 USA COI	0.235974	0.221122	0.00330033	0.214521	0.214521	0.214521	0.214521	0.214521	0.214521	0.214521	0.20462	0.0049505	0.00330033
15	EU244598 Paramacrobiotus kenianus group 1 Kenya COI	0.229373	0.207921	0.224422	0.219472	0.219472	0.222772	0.222772	0.222772	0.222772	0.222772	0.20132	0.226073	0.222772	0.226073
16	EU244599 Paramacrobiotus kenianus group 2 Kenya COI	0.234323	0.214521	0.222772	0.224422	0.224422	0.224422	0.224422	0.224422	0.224422	0.224422	0.209571	0.224422	0.221122	0.224422	0.0412541
17	FORMIGINE-1 C2680 Mr FOR F3 2n COI	0.222772	0.209571	0.183168	0.217822	0.217822	0.214521	0.214521	0.214521	0.214521	0.214521	0.194719	0.179868	0.183168	0.183168	0.20132	0.20462
18	FORMIGINE-2 C2680 Mr FOR M2 2n COI	0.222772	0.209571	0.183168	0.217822	0.217822	0.214521	0.214521	0.214521	0.214521	0.214521	0.194719	0.179868	0.183168	0.183168	0.20132	0.20462	0
19	FORMIGINE-3 C2681 Mr FOR M6 2n COI	0.222772	0.209571	0.183168	0.217822	0.217822	0.214521	0.214521	0.214521	0.214521	0.214521	0.194719	0.179868	0.183168	0.183168	0.20132	0.20462	0	0
20	FORMIGINE-4 C2842 Pr FOR 4 2n COI	0.222772	0.209571	0.183168	0.217822	0.217822	0.214521	0.214521	0.214521	0.214521	0.214521	0.194719	0.179868	0.183168	0.183168	0.20132	0.20462	0	0	0
21	AY598778 Paramacrobiotus richtersi Riccò C2345 MR2 COI	0.232673	0.221122	0.00330033	0.211221	0.211221	0.211221	0.211221	0.211221	0.211221	0.211221	0.20132	0.0049505	0.00330033	0.00330033	0.224422	0.222772	0.181518	0.181518	0.181518	0.181518
22	AY598779 Paramacrobiotus richtersi Riccò C2345 MR3 COI	0.235	0.218333	0.00166667	0.213333	0.213333	0.213333	0.213333	0.213333	0.213333	0.213333	0.205	0.00333333	0.00166667	0.00166667	0.221667	0.221667	0.178333	0.178333	0.178333	0.178333	0.00166667
23	RICCÒ-1 C2683 Mr RIC F1 3n COI	0.234323	0.219472	0.00165017	0.212871	0.212871	0.212871	0.212871	0.212871	0.212871	0.212871	0.20297	0.00330033	0.00165017	0.00165017	0.224422	0.222772	0.181518	0.181518	0.181518	0.181518	0.00165017	0
24	RICCÒ-2 C2683 Mr RIC F3 3n COI	0.238255	0.218121	0.0033557	0.213087	0.213087	0.213087	0.213087	0.213087	0.213087	0.213087	0.208054	0.00503356	0.0033557	0.0033557	0.224832	0.224832	0.17953	0.17953	0.17953	0.17953	0.0033557	0.00167785	0.00167785
25	RICCÒ-3 C2683 Mr RIC CL1 3n COI	0.240137	0.217839	0.00343053	0.216123	0.216123	0.216123	0.216123	0.216123	0.216123	0.216123	0.210978	0.0051458	0.00343053	0.00343053	0.226415	0.226415	0.180103	0.180103	0.180103	0.180103	0.00343053	0.00171527	0.00171527	0.00343053
26	ROCCHETTA-1 C2690 Mr RST F1 3n COI	0.232673	0.221122	0.00330033	0.211221	0.211221	0.211221	0.211221	0.211221	0.211221	0.211221	0.20132	0.0049505	0.00330033	0.00330033	0.226073	0.224422	0.183168	0.183168	0.183168	0.183168	0.00330033	0.00166667	0.00165017	0.0033557	0.00343053
27	ROCCHETTA-2 C2690 Mr RST F4 3n COI	0.234323	0.219472	0.00165017	0.212871	0.212871	0.212871	0.212871	0.212871	0.212871	0.212871	0.20297	0.00330033	0.00165017	0.00165017	0.224422	0.222772	0.181518	0.181518	0.181518	0.181518	0.00165017	0	0	0.00167785	0.00171527	0.00165017
28	ROCCHETTA-3 C2690 Mr RST FD 3n COI	0.232673	0.221122	0.00330033	0.211221	0.211221	0.211221	0.211221	0.211221	0.211221	0.211221	0.20132	0.0049505	0.00330033	0.00330033	0.226073	0.224422	0.183168	0.183168	0.183168	0.183168	0.00330033	0.00166667	0.00165017	0.0033557	0.00343053	0	0.00165017
29	GAGGIO-1 C2698 Mr VSR F3 2n COI	0.225753	0.210702	0.182274	0.214047	0.214047	0.210702	0.210702	0.210702	0.210702	0.210702	0.192308	0.17893	0.182274	0.182274	0.204013	0.204013	0.0117057	0.0117057	0.0117057	0.0117057	0.180602	0.180602	0.180602	0.181208	0.181818	0.182274	0.180602	0.182274
30	GAGGIO-2 C2698 Mr VSR M1 2n COI	0.226073	0.211221	0.184818	0.216172	0.216172	0.212871	0.212871	0.212871	0.212871	0.212871	0.194719	0.181518	0.184818	0.184818	0.20132	0.20297	0.0132013	0.0132013	0.0132013	0.0132013	0.183168	0.18	0.183168	0.181208	0.181818	0.184818	0.183168	0.184818	0
31	GAGGIO-3 C2698 Mr VSR M3 2n COI	0.222772	0.209571	0.183168	0.217822	0.217822	0.214521	0.214521	0.214521	0.214521	0.214521	0.194719	0.179868	0.183168	0.183168	0.20132	0.20462	0	0	0	0	0.181518	0.178333	0.181518	0.17953	0.180103	0.183168	0.181518	0.183168	0.0117057	0.0132013
32	PASSO BALLINO-1 C2693 Mr BAT F2 2n COI	0.231156	0.234506	0.179229	0.19263	0.19263	0.19598	0.19598	0.19598	0.19598	0.19598	0.194305	0.18258	0.179229	0.180905	0.222781	0.231156	0.19263	0.19263	0.19263	0.19263	0.177554	0.179229	0.179229	0.181208	0.181818	0.177554	0.179229	0.177554	0.190955	0.190955	0.19263
33	PASSO BALLINO-2 C2693 Mr BAT M1 2n COI	0.235974	0.237624	0.181518	0.19967	0.19967	0.20297	0.20297	0.20297	0.20297	0.20297	0.19802	0.184818	0.181518	0.183168	0.226073	0.231023	0.19637	0.19637	0.19637	0.19637	0.179868	0.183333	0.181518	0.186242	0.186964	0.179868	0.181518	0.179868	0.192308	0.194719	0.19637	0.0184255
34	PASSO BALLINO-3 C2693 Mr BAT M2 2n COI	0.222772	0.231023	0.176568	0.194719	0.194719	0.19802	0.19802	0.19802	0.19802	0.19802	0.186469	0.179868	0.176568	0.178218	0.222772	0.226073	0.193069	0.193069	0.193069	0.193069	0.174917	0.178333	0.176568	0.181208	0.181818	0.174917	0.176568	0.174917	0.188963	0.191419	0.193069	0.00837521	0.0165017
35	PIANE DI MOCOGNO-1 C2112 Mr PIA F1 2n COI	0.245875	0.239274	0.184818	0.189769	0.189769	0.193069	0.193069	0.193069	0.193069	0.193069	0.19802	0.184818	0.184818	0.186469	0.219472	0.227723	0.19802	0.19802	0.19802	0.19802	0.184818	0.186667	0.184818	0.186242	0.186964	0.186469	0.184818	0.186469	0.195652	0.19967	0.19802	0.140704	0.151815	0.138614
36	PIANE DI MOCOGNO-2 C2112 Mr PIA M1 2n COI	0.245875	0.239274	0.183168	0.189769	0.189769	0.189769	0.189769	0.189769	0.189769	0.189769	0.19802	0.183168	0.183168	0.184818	0.226073	0.231023	0.19967	0.19967	0.19967	0.19967	0.183168	0.185	0.183168	0.184564	0.185249	0.184818	0.183168	0.184818	0.197324	0.20132	0.19967	0.144054	0.155116	0.141914	0.00990099
37	PIANE DI MOCOGNO-3 C2112 Mr PIA M3 2n COI	0.245875	0.239274	0.183168	0.189769	0.189769	0.189769	0.189769	0.189769	0.189769	0.189769	0.19802	0.183168	0.183168	0.184818	0.226073	0.231023	0.19967	0.19967	0.19967	0.19967	0.183168	0.185	0.183168	0.184564	0.185249	0.184818	0.183168	0.184818	0.197324	0.20132	0.19967	0.144054	0.155116	0.141914	0.00990099	0
38	PONDEL-1 C2701 Mr VDA F6 3n COI	0.234323	0.219472	0.00165017	0.212871	0.212871	0.212871	0.212871	0.212871	0.212871	0.212871	0.20297	0.00330033	0.00165017	0.00165017	0.224422	0.222772	0.181518	0.181518	0.181518	0.181518	0.00165017	0	0	0.00167785	0.00171527	0.00165017	0	0.00165017	0.180602	0.183168	0.181518	0.179229	0.181518	0.176568	0.184818	0.183168	0.183168
39	PONDEL-2 C2701 Mr VDA F9 3n COI	0.235974	0.221122	0.00330033	0.212871	0.212871	0.212871	0.212871	0.212871	0.212871	0.212871	0.20297	0.0049505	0.00330033	0.00330033	0.226073	0.224422	0.181518	0.181518	0.181518	0.181518	0.00330033	0.00166667	0.00165017	0.0033557	0.00343053	0.00330033	0.00165017	0.00330033	0.180602	0.183168	0.181518	0.179229	0.181518	0.176568	0.184818	0.183168	0.183168	0.00165017
40	OLBIA-1 C2702 Mr SAR M5D2 2n COI	0.211221	0.209571	0.19802	0.216172	0.216172	0.216172	0.216172	0.216172	0.216172	0.216172	0.20297	0.19637	0.19802	0.19802	0.221122	0.214521	0.184818	0.184818	0.184818	0.184818	0.194719	0.195	0.19637	0.197987	0.19211	0.194719	0.19637	0.194719	0.19398	0.193069	0.184818	0.177554	0.183168	0.178218	0.20462	0.206271	0.206271	0.19637	0.19802
41	PRODO-1 C2702 Mr UMB F1 2n COI	0.229373	0.224422	0.219472	0.247525	0.247525	0.244224	0.244224	0.244224	0.244224	0.244224	0.224422	0.217822	0.219472	0.219472	0.221122	0.232673	0.211221	0.211221	0.211221	0.211221	0.217822	0.215	0.217822	0.216443	0.212693	0.219472	0.217822	0.219472	0.214047	0.212871	0.211221	0.207705	0.214521	0.209571	0.20462	0.207921	0.207921	0.217822	0.216172	0.189769
42	PRODO-2 C2702 Mr UMB F2 2n COI	0.229373	0.224422	0.219472	0.249175	0.249175	0.245875	0.245875	0.245875	0.245875	0.245875	0.224422	0.217822	0.219472	0.219472	0.221122	0.232673	0.211221	0.211221	0.211221	0.211221	0.217822	0.215	0.217822	0.216443	0.212693	0.219472	0.217822	0.219472	0.214047	0.212871	0.211221	0.207705	0.214521	0.209571	0.20462	0.207921	0.207921	0.217822	0.216172	0.189769	0.00330033
43	PRODO-3 C2702 Mr UMB M1 2n COI	0.231023	0.219472	0.214521	0.244224	0.244224	0.244224	0.244224	0.244224	0.244224	0.244224	0.214521	0.212871	0.214521	0.214521	0.217822	0.229373	0.212871	0.212871	0.212871	0.212871	0.212871	0.21	0.212871	0.211409	0.207547	0.214521	0.212871	0.214521	0.212375	0.211221	0.212871	0.20268	0.209571	0.20462	0.20462	0.207921	0.207921	0.212871	0.211221	0.179868	0.019802	0.019802
44	CLARE ISLAND-1 C2714 Mr CII F2 2n COI	0.216172	0.224422	0.183168	0.219472	0.219472	0.219472	0.219472	0.219472	0.219472	0.219472	0.20462	0.181518	0.183168	0.183168	0.227723	0.231023	0.179868	0.179868	0.179868	0.179868	0.179868	0.178333	0.181518	0.17953	0.180103	0.179868	0.181518	0.179868	0.187291	0.186469	0.179868	0.187605	0.186469	0.191419	0.194719	0.194719	0.194719	0.181518	0.181518	0.19802	0.186469	0.186469	0.181518
45	CLARE ISLAND-2 C2714 Mr CII F4 2n COI	0.212871	0.222772	0.191419	0.219472	0.219472	0.219472	0.219472	0.219472	0.219472	0.219472	0.20462	0.189769	0.191419	0.191419	0.227723	0.231023	0.184818	0.184818	0.184818	0.184818	0.188119	0.186667	0.189769	0.187919	0.188679	0.188119	0.189769	0.188119	0.190635	0.189769	0.184818	0.18258	0.181518	0.183168	0.194719	0.194719	0.194719	0.189769	0.189769	0.20297	0.189769	0.189769	0.183168	0.0115512
46	CLARE ISLAND-3 C2714 Mr CII M2 2n COI	0.212871	0.222772	0.191419	0.216172	0.216172	0.216172	0.216172	0.216172	0.216172	0.216172	0.20132	0.189769	0.191419	0.191419	0.224422	0.227723	0.184818	0.184818	0.184818	0.184818	0.188119	0.186667	0.189769	0.187919	0.188679	0.188119	0.189769	0.188119	0.190635	0.189769	0.184818	0.18593	0.184818	0.186469	0.191419	0.191419	0.191419	0.189769	0.189769	0.20297	0.191419	0.191419	0.184818	0.0115512	0.00330033
47	ANDALO-1 C2762 Mr AND 1 2n COI	0.232673	0.221122	0.178218	0.19967	0.19967	0.20297	0.20297	0.20297	0.20297	0.20297	0.19637	0.181518	0.178218	0.179868	0.227723	0.235974	0.19637	0.19637	0.19637	0.19637	0.179868	0.178333	0.178218	0.181208	0.181818	0.176568	0.178218	0.176568	0.190635	0.191419	0.19637	0.0351759	0.0445545	0.0346535	0.143564	0.146865	0.146865	0.178218	0.178218	0.179868	0.212871	0.212871	0.206271	0.19967	0.194719	0.194719
48	OSPITALETTO A-1 C2794 Mr OSP 1 2n COI	0.227723	0.229373	0.186469	0.20462	0.20462	0.207921	0.207921	0.207921	0.207921	0.207921	0.194719	0.189769	0.186469	0.188119	0.226073	0.231023	0.19967	0.19967	0.19967	0.19967	0.188119	0.188333	0.186469	0.191275	0.19211	0.184818	0.186469	0.184818	0.195652	0.19802	0.19967	0.0452261	0.0528053	0.0429043	0.146865	0.150165	0.150165	0.186469	0.186469	0.178218	0.207921	0.207921	0.206271	0.189769	0.183168	0.186469	0.049505
49	OSPITALETTO B-1 C2793 Mr OSP 1 3n COI	0.234899	0.218121	0.00167785	0.213087	0.213087	0.213087	0.213087	0.213087	0.213087	0.213087	0.201342	0.0033557	0.00167785	0.00167785	0.223154	0.223154	0.177852	0.177852	0.177852	0.177852	0.00167785	0	0	0.00170648	0.0017452	0.00167785	0	0.00167785	0.176871	0.17953	0.177852	0.178876	0.181208	0.176174	0.186242	0.184564	0.184564	0	0.00167785	0.196309	0.218121	0.218121	0.213087	0.17953	0.187919	0.187919	0.177852	0.186242
[truncated: 1 more columns]

## Sheet: Caption
Table. Estimates of Evolutionary Divergence between Sequences
The number of base differences per site from between sequences are shown. The analysis involved 49 nucleotide sequences. Codon positions included were 1st+2nd+3rd+Noncoding. All ambiguous positions were removed for each sequence pair. There were a total of 606 positions in the final dataset. Evolutionary analyses were conducted in MEGA X [1].
1. Kumar S., Stecher G., Li M., Knyaz C., and Tamura K. (2018). MEGA X: Molecular Evolutionary Genetics Analysis across computing platforms. Molecular Biology and Evolution 35:1547-1549.
Disclaimer: Although utmost care has been taken to ensure the correctness of the caption, the caption text is provided "as is" without any warranty of any kind. Authors advise the user to carefully check the caption prior to its use for any purpose and report any errors or problems to the authors immediately (www.megasoftware.net). In no event shall the authors and their employers be liable for a…
